# Supplementary material
Source: Elsevier journal article supplement (https://www.sciencedirect.com/science/article/pii/S0300893218305591)
Supplement: mmc1 [file S0300893218305591:mmc1.pdf]

**SUPPLEMENTARY DATA****Table 1**

Association Between 1-year Posttransplant Serum Galectin-3 Levels (Continuous Variable) and the Risk of Death or Graft Failure over Long-Term Follow-up: Univariable and Multivariable Cox Regression Analyses

|                                                   | Univariable analysis |           | Multivariable analysis |           |
|---------------------------------------------------|----------------------|-----------|------------------------|-----------|
|                                                   | HR                   | 95%CI     | HR                     | 95%CI     |
| Recipient age, y                                  | 0.99                 | 0.96–1.02 | 0.96                   | 0.93–1    |
| Donor age, y                                      | 1                    | 0.97–1.02 | –                      | –         |
| Male recipient                                    | 0.85                 | 0.39–1.86 | –                      | –         |
| Male donor                                        | 0.50                 | 0.23–1.07 | 0.33                   | 0.14–0.75 |
| Right atrial pressure, mmHg                       | 1.12                 | 1.04–1.20 | 1.13                   | 1.05–1.22 |
| Left ventricular ejection fraction, %             | 0.97                 | 0.92–1.02 | –                      | –         |
| Glomerular filtration rate, mL/min/m <sup>2</sup> | 1                    | 0.98–1.02 | –                      | –         |
| Use of tacrolimus                                 | 1.94                 | 0.88–4.24 | 2.87                   | 1.18–6.98 |
| Use of mycophenolate mophetil                     | 1.13                 | 0.43–2.96 | –                      | –         |
| Serum galectin-3 (ng/mL)                          | 1.04                 | 1.01–1.06 | 1.04                   | 1.01–1.08 |

95%CI, 95%confidence interval; HR, hazard ratio.

**Table 2**

Association between 1-Year Posttransplant Serum Galectin-3 Levels  $\geq 17.8$  ng/mL (Dichotomous Variable) and the Risk of Death or Graft Failure Over Long-Term Follow-up: Univariable and Multivariable Cox Regression Analyses

|                                                   | Univariable analysis |           | Multivariable analysis |           |
|---------------------------------------------------|----------------------|-----------|------------------------|-----------|
|                                                   | HR                   | 95%CI     | HR                     | 95%CI     |
| Recipient age, y                                  | 0.99                 | 0.96–1.02 | 0.96                   | 0.93–1    |
| Donor age, y                                      | 1                    | 0.97–1.02 | –                      | –         |
| Male recipient                                    | 0.85                 | 0.39–1.86 | –                      | –         |
| Male donor                                        | 0.50                 | 0.23–1.07 | 0.35                   | 0.15–0.80 |
| Right atrial pressure, mmHg                       | 1.12                 | 1.04–1.20 | 1.10                   | 1.02–1.19 |
| Left ventricular ejection fraction, %             | 0.97                 | 0.92–1.02 | –                      | –         |
| Glomerular filtration rate, mL/min/m <sup>2</sup> | 1                    | 0.98–1.02 | –                      | –         |
| Use of tacrolimus                                 | 1.94                 | 0.88–4.24 | 2.64                   | 1.07–6.52 |
| Use of mycophenolate mophetil                     | 1.13                 | 0.43–2.96 | –                      | –         |
| Serum galectin-3 $\geq 17.8$ , ng/mL              | 2.96                 | 1.44–6.10 | 2.74                   | 1.07–7.02 |

95%CI, 95%confidence interval; HR, hazard ratio.
